# Supplementary material for: Research on Urban Expansion and Population Density Change of an Urban Agglomeration in the Central‐Southern Region of Liaoning Province, China
Source: Hindawi journal article supplement (doi:10.1155/2022/5327023), 2022-01-01
Supplement: f1 [file 5327023.f1.zip]

Construction area

| City      | Distance to city center | Circle area  | 1995        |                   |               | 2005        |                   |               | 2015      |                   |               |
|-----------|-------------------------|--------------|-------------|-------------------|---------------|-------------|-------------------|---------------|-----------|-------------------|---------------|
|           |                         |              | Total       | Construction area | Urban density | Total       | Construction area | Urban density | Total     | Construction area | Urban density |
| Shen Yang | 0.01                    | 2899606.51   | 2899606.511 | 2899606.511       | 1             | 2899606.5   | 2899606.511       | 1             | 2899606.5 | 2899606.511       | 1             |
| Shen Yang | 0.02                    | 8699508.97   | 8699508.929 | 8699508.929       | 1             | 8699508.9   | 8699508.929       | 1             | 8699508.9 | 8699508.929       | 1             |
| Shen Yang | 0.03                    | 14499411.58  | 14499411.55 | 14499411.55       | 1             | 14499411.6  | 14499411.55       | 1             | 14499412  | 14499411.55       | 1             |
| Shen Yang | 0.04                    | 20299316.58  | 20299316.71 | 19921014.17       | 0.98136378    | 20299316.7  | 19921014.17       | 0.9813638     | 20299317  | 19921014.17       | 0.9813638     |
| Shen Yang | 0.05                    | 26099221.84  | 26099221.83 | 23992928.81       | 0.930131286   | 26099221.8  | 23994751.03       | 0.9302019     | 26099222  | 23994751.03       | 0.9302019     |
| Shen Yang | 0.06                    | 31899118.30  | 31899118.2  | 26768967.98       | 0.868835783   | 31899118.2  | 27834450.53       | 0.9034037     | 31899118  | 28270139.58       | 0.916524      |
| Shen Yang | 0.07                    | 37699021.21  | 37699021.28 | 24613796.31       | 0.698803822   | 37699021.3  | 26317414.73       | 0.7474033     | 37699021  | 29178833.72       | 0.8238308     |
| Shen Yang | 0.08                    | 43498908.62  | 43498908.57 | 25130686.69       | 0.589990205   | 43498908.6  | 28499532.95       | 0.669069      | 43498909  | 33699667.85       | 0.7911326     |
| Shen Yang | 0.09                    | 49298817.35  | 49298817.37 | 25889034.96       | 0.535339585   | 49298817.3  | 29006145.94       | 0.5998197     | 49298817  | 32432154.39       | 0.6706222     |
| Shen Yang | 0.10                    | 55098703.50  | 55098703.42 | 25249733.73       | 0.46645838    | 55098703.5  | 27630202.78       | 0.5104328     | 55098703  | 32773674.8        | 0.6055457     |
| Shen Yang | 0.11                    | 60898592.56  | 60898592.61 | 18492042.13       | 0.312101451   | 60898592.6  | 24306132.99       | 0.4102229     | 60898593  | 30765587.56       | 0.5192682     |
| Shen Yang | 0.12                    | 66698482.31  | 66698482.17 | 14371666.84       | 0.218769398   | 66698482.2  | 19968023.08       | 0.3034759     | 66698482  | 28870206.61       | 0.4387721     |
| Shen Yang | 0.13                    | 72498375.72  | 72498375.99 | 14448737.65       | 0.201244522   | 72498376.0  | 19808365.91       | 0.2758579     | 72498376  | 30588404.9        | 0.4259843     |
| Shen Yang | 0.14                    | 78298238.22  | 78298238.27 | 14014793.72       | 0.180242994   | 78298238.2  | 18396136.05       | 0.2367491     | 78298238  | 26305316.68       | 0.3385364     |
| Shen Yang | 0.15                    | 84098127.87  | 84098127.73 | 11305225.71       | 0.135222428   | 84098127.8  | 15662768.6        | 0.1873511     | 84098128  | 24370565.73       | 0.2915099     |
| Shen Yang | 0.16                    | 89898010.09  | 89898009.98 | 15942963.01       | 0.179358305   | 89898010.0  | 21006678.08       | 0.2363251     | 89898010  | 28524074.05       | 0.3208958     |
| Shen Yang | 0.17                    | 95697870.82  | 95697870.97 | 14314629.11       | 0.151319162   | 95697871.0  | 18904706.25       | 0.1998709     | 95697871  | 26333402.73       | 0.2783849     |
| Shen Yang | 0.18                    | 101497733.82 | 101497734   | 13793113.03       | 0.137311714   | 101497733.8 | 18713696.8        | 0.1863157     | 101497734 | 27530737.39       | 0.274033      |
| Shen Yang | 0.19                    | 107297591.02 | 107297590.8 | 15929594.33       | 0.150336303   | 107297590.8 | 21060114.59       | 0.1987013     | 107297591 | 31652442.82       | 0.2986395     |
| Shen Yang | 0.20                    | 113097455.42 | 113097455.5 | 10872420          | 0.097063288   | 113097455.6 | 15543681.58       | 0.1384995     | 113097456 | 24827203.05       | 0.2212188     |
| Shen Yang | 0.21                    | 118897311.93 | 118897311.9 | 13056260.34       | 0.111070214   | 118897311.9 | 15549600.03       | 0.1322783     | 118897312 | 20482961.79       | 0.1742457     |
| Shen Yang | 0.22                    | 124697140.53 | 124697140.7 | 11112587.41       | 0.089908116   | 124697140.6 | 11111559.41       | 0.0898998     | 124697141 | 15273168.9        | 0.1235699     |
| Shen Yang | 0.23                    | 130496986.99 | 130496986.9 | 14047840.45       | 0.108211061   | 130496986.9 | 13576198.6        | 0.104578      | 130496987 | 16115318.89       | 0.1241369     |
| Shen Yang | 0.24                    | 136296812.86 | 136296812.4 | 14864070.47       | 0.109605833   | 136296812.4 | 14572190.75       | 0.1074535     | 136296812 | 18267769.92       | 0.1347043     |
| Shen Yang | 0.25                    | 142096644.49 | 141828052.4 | 13839748.4        | 0.098153635   | 141828052.5 | 13397898.94       | 0.09502       | 141828052 | 17613175.32       | 0.1249154     |
| Shen Yang | 0.26                    | 147896473.25 | 141578777.4 | 12614348          | 0.089412722   | 141578772.5 | 12508366.36       | 0.0886615     | 141578780 | 15441057.35       | 0.1094489     |
| Shen Yang | 0.27                    | 153696262.35 | 140194848.6 | 13978024.87       | 0.100524059   | 140194848.4 | 14136605.17       | 0.1016623     | 140194848 | 16013789.48       | 0.1151619     |
| Shen Yang | 0.28                    | 159496089.56 | 143435027.8 | 17548989.73       | 0.123952493   | 143435027.8 | 17156454.57       | 0.1211799     | 143435026 | 17803246.94       | 0.1257484     |
| Shen Yang | 0.29                    | 165295878.29 | 145444858.1 | 9373650.712       | 0.065134387   | 145444848.7 | 9246006.726       | 0.0642474     | 145444849 | 10537765.29       | 0.0732234     |
| Shen Yang | 0.30                    | 171095674.12 | 148607442.3 | 19323659.76       | 0.131580631   | 148607441.4 | 19167051.25       | 0.1305142     | 148607441 | 19326322.8        | 0.1315988     |

|           |      |              |             |             |             |             |             |           |           |             |           |
|-----------|------|--------------|-------------|-------------|-------------|-------------|-------------|-----------|-----------|-------------|-----------|
| Shen Yang | 0.31 | 176895446.87 | 141968361.2 | 11169000.4  | 0.079398877 | 141968373.1 | 11067367.21 | 0.0786764 | 141968372 | 11456442.4  | 0.0814423 |
| Shen Yang | 0.32 | 182695226.51 | 123701258.3 | 10644047.72 | 0.086812617 | 123701263.2 | 10566158.42 | 0.0862249 | 123701263 | 10699135.04 | 0.0872126 |
| Shen Yang | 0.33 | 188494997.62 | 116347840.3 | 7140063.09  | 0.061778885 | 116347838.0 | 7170165.908 | 0.0620524 | 116347837 | 7394707.585 | 0.0639303 |
| Shen Yang | 0.34 | 194294760.41 | 106699311   | 9588402.316 | 0.091035836 | 106699318.7 | 9502746.418 | 0.0902575 | 106699319 | 9865523.756 | 0.0937032 |
| Shen Yang | 0.35 | 200094495.94 | 98053038.87 | 5971728.184 | 0.062124988 | 98053039.6  | 6051120.414 | 0.0630055 | 98053040  | 6135758.142 | 0.0638868 |
| Shen Yang | 0.36 | 205894239.35 | 86949396.37 | 4200838.086 | 0.049569697 | 86949396.4  | 4278255.29  | 0.0504772 | 86949397  | 4249814.78  | 0.0501416 |
| Shen Yang | 0.37 | 211693955.15 | 76845246.77 | 5646668.135 | 0.075346453 | 76845247.0  | 5462554.067 | 0.0728897 | 76845247  | 5425380.306 | 0.0723937 |
| Shen Yang | 0.38 | 217493678.59 | 63725339.69 | 3825998.459 | 0.061587625 | 63725339.8  | 3888180.87  | 0.0625886 | 63725339  | 3891301.879 | 0.0626388 |
| Shen Yang | 0.39 | 223293412.24 | 55322291.46 | 2447013.551 | 0.044964825 | 55322291.5  | 3016229.207 | 0.0554244 | 55322292  | 3268653.161 | 0.0600628 |
| Da Lian   | 0.01 | 3021744.90   | 3021744.913 | 2652050.451 | 0.877655304 | 3021744.9   | 2760128.693 | 0.9134221 | 6043489.8 | 5520257.385 | 0.9134221 |
| Da Lian   | 0.02 | 9065953.19   | 7334660.677 | 5427392.397 | 0.765466505 | 7873117.5   | 5952874.673 | 0.7977352 | 15746235  | 11905749.35 | 0.7977352 |
| Da Lian   | 0.03 | 15110161.63  | 6178215.081 | 3693269.441 | 0.685305181 | 6344965.3   | 3784668.224 | 0.6904788 | 12693016  | 7572421.646 | 0.6905659 |
| Da Lian   | 0.04 | 21154372.57  | 9025725.525 | 4514570.262 | 0.526010908 | 9121736.5   | 4698774.659 | 0.5414167 | 18306124  | 9447294.085 | 0.5423251 |
| Da Lian   | 0.05 | 27198583.78  | 11872519.6  | 6179106.474 | 0.520454519 | 12471413.8  | 8762850.963 | 0.7026349 | 26055332  | 18636045.35 | 0.7152488 |
| Da Lian   | 0.06 | 33242785.83  | 19906572.82 | 13677147.14 | 0.687066893 | 20002093.9  | 16251524.7  | 0.8124912 | 41578483  | 34072516.21 | 0.8194747 |
| Da Lian   | 0.07 | 39286994.61  | 28456031.51 | 17122432.16 | 0.601715392 | 28627903.6  | 19322109.05 | 0.6749397 | 57237047  | 39855344.05 | 0.6963208 |
| Da Lian   | 0.08 | 45331187.25  | 35323748.56 | 18479762.69 | 0.523154066 | 35319099.6  | 20285486.81 | 0.5743489 | 70635079  | 43307012.76 | 0.6131091 |
| Da Lian   | 0.09 | 51375402.11  | 41797021.78 | 20490701.69 | 0.498635459 | 41799866.1  | 21652830.52 | 0.5270087 | 83599732  | 51997859.15 | 0.6327885 |
| Da Lian   | 0.10 | 57419593.45  | 43414126.09 | 18674991.46 | 0.481952519 | 43351593.1  | 20506301.99 | 0.5331589 | 86722938  | 45412900.46 | 0.581406  |
| Da Lian   | 0.11 | 63463787.85  | 41560457.92 | 15951385.88 | 0.448861928 | 41799789.0  | 20525349.76 | 0.5711028 | 83645197  | 43972649.94 | 0.6110006 |
| Da Lian   | 0.12 | 69507982.97  | 37856854.79 | 15460310.97 | 0.422967569 | 38249881.2  | 19194070.87 | 0.5168754 | 76499762  | 40360202.87 | 0.5434282 |
| Da Lian   | 0.13 | 75552181.92  | 29393875.49 | 12465805.14 | 0.434938493 | 29806155.8  | 14678178.77 | 0.5053857 | 59713201  | 31801096.01 | 0.546524  |
| Da Lian   | 0.14 | 81596348.69  | 29032546.33 | 14127440.11 | 0.49492729  | 29034277.8  | 15215023.67 | 0.5340544 | 58093129  | 30867794.58 | 0.5415035 |
| Da Lian   | 0.15 | 87640543.76  | 30601349.99 | 14417383.48 | 0.482257823 | 30602590.1  | 16104556.63 | 0.5387315 | 61324366  | 32296568.21 | 0.5391263 |
| Da Lian   | 0.16 | 93684731.12  | 32896717.76 | 12383082.97 | 0.378667236 | 32914745.4  | 13636499.76 | 0.4168018 | 66773126  | 28640651.56 | 0.4314806 |
| Da Lian   | 0.17 | 99728896.10  | 39825284.13 | 12621598.49 | 0.316924255 | 39800897.5  | 14509597.14 | 0.3645545 | 79987073  | 31867093.64 | 0.398403  |
| Da Lian   | 0.18 | 105773063.46 | 44850129.88 | 9129651.401 | 0.204241421 | 44847167.0  | 12947874.51 | 0.2896789 | 89694334  | 26725226.19 | 0.2989577 |
| Da Lian   | 0.19 | 111817224.81 | 47191503.24 | 4816451.289 | 0.103937952 | 47711361.5  | 8802584.077 | 0.1878504 | 95422723  | 18781979.59 | 0.2004072 |
| Da Lian   | 0.20 | 117861393.70 | 50230353.82 | 5202948.428 | 0.10766874  | 52586723.4  | 9137667.337 | 0.1807318 | 105173447 | 19681771.07 | 0.1946406 |
| Da Lian   | 0.21 | 123905554.39 | 54761830.2  | 5764822.434 | 0.108740836 | 57969952.3  | 9337241.667 | 0.1661197 | 115939905 | 19589890.09 | 0.1742627 |
| Da Lian   | 0.22 | 129949686.02 | 58708030.74 | 5337172.983 | 0.092600905 | 60695962.7  | 7335684.234 | 0.1221718 | 121391925 | 16490313.32 | 0.1373186 |
| Da Lian   | 0.23 | 135993836.29 | 56935563.15 | 5305288.142 | 0.094953631 | 59126367.9  | 7209918.759 | 0.124049  | 118253807 | 16940967.11 | 0.1457361 |
| Da Lian   | 0.24 | 142037965.14 | 57763882.63 | 4167200.44  | 0.079531697 | 59195604.3  | 5359181.685 | 0.0991357 | 118388104 | 11439105.48 | 0.1058049 |

|         |      |              |             |             |             |            |             |           |           |             |           |
|---------|------|--------------|-------------|-------------|-------------|------------|-------------|-----------|-----------|-------------|-----------|
| Da Lian | 0.25 | 148082100.03 | 57860593.76 | 5516853.388 | 0.105828384 | 59147841.2 | 6175081.487 | 0.1156525 | 118295682 | 14275413.99 | 0.1336814 |
| Da Lian | 0.26 | 154126231.95 | 56313944.45 | 4308185.972 | 0.081726437 | 56626621.1 | 5637432.47  | 0.1037577 | 113253242 | 13229018.41 | 0.1217409 |
| Da Lian | 0.27 | 160170322.59 | 57927103.11 | 4502587.463 | 0.081510512 | 57925087.3 | 5025622.616 | 0.0903281 | 115850175 | 12022698.57 | 0.1080451 |
| Da Lian | 0.28 | 166214452.98 | 62087311.53 | 2835440.484 | 0.047839802 | 62070206.8 | 2937616.238 | 0.0494998 | 124139535 | 6696445.765 | 0.056419  |
| Da Lian | 0.29 | 172258543.30 | 63116869.33 | 3964377.601 | 0.068733811 | 63102516.4 | 3954985.876 | 0.0685871 | 126207814 | 8912988.971 | 0.0772823 |
| Da Lian | 0.30 | 178302641.08 | 59151569.2  | 2391669.425 | 0.045431786 | 59168735.4 | 2423404.433 | 0.0460241 | 118337471 | 5014224.856 | 0.0476138 |
| Da Lian | 0.31 | 184346714.83 | 55268362.23 | 3428194.57  | 0.065533505 | 55268192.2 | 3522804.878 | 0.067356  | 110536384 | 7045609.756 | 0.067356  |
| Da Lian | 0.32 | 190390795.81 | 53526238.39 | 4476224.101 | 0.091025406 | 53783759.2 | 4825964.083 | 0.0981099 | 107567518 | 9778981.795 | 0.0994014 |
| Da Lian | 0.33 | 196434867.96 | 52011306.71 | 4569136.846 | 0.093560956 | 52430907.2 | 5038691.086 | 0.1032043 | 104861814 | 10069206.43 | 0.1031205 |
| Da Lian | 0.34 | 202478931.47 | 49650856.1  | 5451880.491 | 0.115648939 | 50175931.0 | 5673063.148 | 0.1203353 | 100351862 | 12040625.47 | 0.127701  |
| Da Lian | 0.35 | 208522966.62 | 50551428.9  | 4542456.835 | 0.095959122 | 50740457.7 | 5029052.798 | 0.1058011 | 101480915 | 11326193.41 | 0.1191401 |
| Da Lian | 0.36 | 214567010.04 | 52313521.07 | 3363539.97  | 0.069859246 | 52322239.5 | 3651728.323 | 0.0758143 | 104644479 | 8339830.476 | 0.0865798 |
| Da Lian | 0.37 | 220611024.74 | 53745641.99 | 3845879.876 | 0.073416004 | 53745642.2 | 4037023.399 | 0.0770648 | 107491284 | 8075708.306 | 0.0771631 |
| Da Lian | 0.38 | 226655047.45 | 53547813.92 | 4725876.264 | 0.089387879 | 53547788.6 | 4962899.005 | 0.0938711 | 107095577 | 11119490.31 | 0.1051602 |
| Da Lian | 0.39 | 232699080.85 | 55021674.79 | 4112504.402 | 0.075622553 | 55024631.3 | 4181131.797 | 0.0769471 | 110049263 | 10207839.35 | 0.0939296 |
| Da Lian | 0.40 | 238743061.60 | 55818407.5  | 4727972.771 | 0.088724027 | 56134585.5 | 5127519.773 | 0.0964308 | 112269171 | 13005747.89 | 0.1223016 |
| An Shan | 0.01 | 2930691.96   | 2930691.949 | 2043420.841 | 0.725032691 | 2930691.9  | 2043420.841 | 0.7250327 | 2930691.9 | 2043420.841 | 0.7250327 |
| An Shan | 0.02 | 8792772.24   | 8792772.305 | 6910046.787 | 0.785878054 | 8792772.3  | 6910511.974 | 0.785931  | 8792772.3 | 6910511.974 | 0.785931  |
| An Shan | 0.03 | 14654851.09  | 14654851.07 | 9632945.828 | 0.657321305 | 14654851.1 | 10522054.88 | 0.7179913 | 14654851  | 10522054.88 | 0.7179913 |
| An Shan | 0.04 | 20516935.00  | 20516934.91 | 13858576.89 | 0.67547014  | 20516934.9 | 15329852.21 | 0.7471804 | 20516935  | 15459588.15 | 0.7535038 |
| An Shan | 0.05 | 26379020.75  | 26379020.8  | 18022378.59 | 0.683208779 | 26379020.8 | 18622016.57 | 0.7059404 | 26379021  | 18673938.63 | 0.7079087 |
| An Shan | 0.06 | 32241092.87  | 32241092.95 | 17510083.39 | 0.543098319 | 32241092.9 | 18567575.9  | 0.5758978 | 32241093  | 18991530.24 | 0.5890473 |
| An Shan | 0.07 | 38103169.92  | 38103169.86 | 18988915.08 | 0.498355259 | 38103169.8 | 19921806.44 | 0.5228386 | 38103170  | 21416952.75 | 0.562078  |
| An Shan | 0.08 | 43965238.16  | 43965238.18 | 16682288.5  | 0.379442696 | 43965238.2 | 19165793.6  | 0.4359306 | 43965238  | 23546624.59 | 0.5355737 |
| An Shan | 0.09 | 49827329.54  | 49043535.89 | 13390448.95 | 0.273058715 | 49043534.9 | 14983077.19 | 0.3055357 | 49043535  | 18354038.12 | 0.3742765 |
| An Shan | 0.10 | 55689389.13  | 53319261.54 | 13476408.19 | 0.257443511 | 53319261.6 | 13950959.29 | 0.266509  | 53319262  | 16332310.49 | 0.3120006 |
| An Shan | 0.11 | 61551455.89  | 53515827.1  | 8323025.281 | 0.158889726 | 53515832.4 | 8321835.675 | 0.158867  | 53515832  | 10174027.46 | 0.194226  |
| An Shan | 0.12 | 67413517.03  | 50770470.93 | 8762815.746 | 0.173428718 | 50770470.3 | 8602292.037 | 0.1702517 | 50770470  | 11142189.32 | 0.2205199 |
| An Shan | 0.13 | 73275593.98  | 51119438.58 | 8649077.266 | 0.173309138 | 51119438.6 | 8578257.258 | 0.1718901 | 51119439  | 11412734.1  | 0.2283822 |
| An Shan | 0.14 | 79137641.29  | 50873012.02 | 8187275.814 | 0.161741583 | 50873012.0 | 8589337.222 | 0.1697183 | 50873012  | 9780216.124 | 0.1932491 |
| An Shan | 0.15 | 84999701.80  | 46825063.34 | 4443625.271 | 0.09710173  | 46825063.4 | 4906230.756 | 0.1072071 | 46825063  | 6104774.707 | 0.1333968 |
| An Shan | 0.16 | 90861753.24  | 42695947.93 | 2510718.78  | 0.05887874  | 42695948.3 | 2579990.941 | 0.0605033 | 42695948  | 2978687.523 | 0.0698531 |
| An Shan | 0.17 | 96723799.30  | 38443166.9  | 2360475.644 | 0.06147683  | 38443166.9 | 2880992.13  | 0.0750333 | 38443167  | 3841579.343 | 0.1000511 |

|          |      |              |             |             |             |            |             |           |           |             |           |
|----------|------|--------------|-------------|-------------|-------------|------------|-------------|-----------|-----------|-------------|-----------|
| An Shan  | 0.18 | 102585849.23 | 37954091.02 | 1735095.181 | 0.04571563  | 37954091.0 | 1766212.846 | 0.0465355 | 37954091  | 1762802.399 | 0.0464456 |
| An Shan  | 0.19 | 108447874.86 | 38958420.96 | 1516001.505 | 0.03896035  | 38958420.3 | 1516001.505 | 0.0389604 | 38958420  | 1492788.328 | 0.0383175 |
| An Shan  | 0.20 | 114309916.74 | 30540370.65 | 2526575.906 | 0.082729052 | 30540370.6 | 2526575.906 | 0.0827291 | 30540371  | 2521162.838 | 0.0825518 |
| An Shan  | 0.21 | 120171939.59 | 24629405.97 | 789495.3539 | 0.03205499  | 24629405.3 | 789495.3539 | 0.032055  | 24629405  | 789495.3539 | 0.032055  |
| An Shan  | 0.22 | 126033955.84 | 18766522.21 | 851901.2363 | 0.045394731 | 18766522.2 | 851901.2363 | 0.0453947 | 18766522  | 851901.2363 | 0.0453947 |
| An Shan  | 0.23 | 131895991.73 | 11013103.01 | 1008326.437 | 0.091556979 | 11013103.0 | 1008326.437 | 0.091557  | 11013103  | 1008326.437 | 0.091557  |
| An Shan  | 0.24 | 137757983.09 | 6234190.851 | 553974.8784 | 0.088860751 | 6234190.9  | 553974.8784 | 0.0888608 | 6234190.9 | 553974.8784 | 0.0888608 |
| An Shan  | 0.25 | 143619978.71 | 4587722.17  | 769682.6616 | 0.167770112 | 4587722.2  | 769682.6616 | 0.1677701 | 4587722.2 | 769682.6616 | 0.1677701 |
| An Shan  | 0.26 | 149481997.27 | 2660126.411 | 3786.116549 | 0.001423284 | 2660126.4  | 3786.116549 | 0.0014233 | 2660126.4 | 3786.116549 | 0.0014233 |
| Ben Xi   | 0.01 | 2922588.34   | 2922588.35  | 2902240.388 | 0.993037691 | 2922588.3  | 2902240.388 | 0.9930377 | 2922588.3 | 2902240.388 | 0.9930377 |
| Ben Xi   | 0.02 | 8768459.39   | 8768459.407 | 6766541.915 | 0.83271651  | 8768459.4  | 6766541.915 | 0.8327165 | 8768459.4 | 6766541.915 | 0.8327165 |
| Ben Xi   | 0.03 | 14614329.01  | 14614329    | 8589728.858 | 0.61142148  | 14614329.0 | 8589728.858 | 0.6114215 | 14614329  | 8589728.858 | 0.6114215 |
| Ben Xi   | 0.04 | 20460203.66  | 20460203.64 | 9224286.557 | 0.464667254 | 20460203.6 | 9224286.557 | 0.4646673 | 20460204  | 9224286.557 | 0.4646673 |
| Ben Xi   | 0.05 | 26306080.16  | 26306080.1  | 7558765.33  | 0.299668716 | 26306080.1 | 7558765.33  | 0.2996687 | 26306080  | 7558765.33  | 0.2996687 |
| Ben Xi   | 0.06 | 32151943.06  | 32151943.1  | 4042191.667 | 0.130153784 | 32151943.1 | 4042191.667 | 0.1301538 | 32151943  | 4042191.667 | 0.1301538 |
| Ben Xi   | 0.07 | 37997810.88  | 37997810.9  | 2173355.754 | 0.058680738 | 37997810.9 | 2173355.754 | 0.0586806 | 37997811  | 2173355.754 | 0.0586806 |
| Ben Xi   | 0.08 | 43843669.92  | 43843669.84 | 2868914.338 | 0.068974452 | 43843669.8 | 2868914.338 | 0.0689746 | 43843670  | 2872215.836 | 0.069054  |
| Ben Xi   | 0.09 | 49689547.30  | 49524025.76 | 3080719.808 | 0.063244436 | 49524025.8 | 3080719.808 | 0.0632453 | 49524026  | 3240318.723 | 0.0665218 |
| Ben Xi   | 0.10 | 55535407.16  | 52665246.12 | 2726865.45  | 0.052261885 | 52665246.1 | 2726865.45  | 0.0522386 | 52665246  | 2904845.06  | 0.0556463 |
| Ben Xi   | 0.11 | 61381259.99  | 54761783.42 | 2564830.801 | 0.04702192  | 54761783.4 | 2611398.701 | 0.0478699 | 54761783  | 2782070.954 | 0.0509985 |
| Ben Xi   | 0.12 | 67227111.93  | 58409205.53 | 2706713.98  | 0.04665625  | 58409205.5 | 2873297.256 | 0.0495332 | 58409206  | 3440837.408 | 0.059317  |
| Ben Xi   | 0.13 | 73072979.65  | 62186426.1  | 913772.2119 | 0.014825537 | 62186426.1 | 938795.4586 | 0.0152317 | 62186426  | 2004961.299 | 0.0325298 |
| Ben Xi   | 0.14 | 78918817.81  | 65947834.61 | 936050.3109 | 0.01429054  | 65947834.6 | 977904.4184 | 0.0149295 | 65947835  | 2357006.996 | 0.0359405 |
| Ben Xi   | 0.15 | 84764669.13  | 70050807.71 | 1781015.533 | 0.025756014 | 70050807.7 | 1965000.22  | 0.0284167 | 70050808  | 3368531.153 | 0.0486517 |
| Ben Xi   | 0.16 | 90610511.40  | 72164007.51 | 1735197.143 | 0.024777346 | 72164007.5 | 1735197.143 | 0.0247773 | 72164007  | 2918976.876 | 0.0416138 |
| Ben Xi   | 0.17 | 96456348.30  | 71116066.25 | 3585419.809 | 0.050917945 | 71116066.3 | 3588328.529 | 0.0509593 | 71116066  | 3888211.6   | 0.0552039 |
| Ben Xi   | 0.18 | 102302179.60 | 67820589.26 | 3780599.359 | 0.055744129 | 67820589.2 | 4072777.746 | 0.0600522 | 67820587  | 5674394.028 | 0.0836677 |
| Ben Xi   | 0.19 | 108148015.06 | 68909786.77 | 3548346.925 | 0.051564467 | 68909786.8 | 3950732.363 | 0.0574119 | 68909787  | 5847288.368 | 0.0849726 |
| Ben Xi   | 0.20 | 113993838.33 | 71308136.79 | 3057879.05  | 0.042961684 | 71308136.8 | 3394691.257 | 0.0476937 | 71308137  | 4530134.998 | 0.0636462 |
| Dan Dong | 0.01 | 2973530.72   | 2973530.7   | 2873020.973 | 0.966198524 | 2973530.7  | 2883313.89  | 0.96966   | 2973530.7 | 2883313.89  | 0.96966   |
| Dan Dong | 0.02 | 8921299.18   | 7139039.152 | 5360822.567 | 0.762438274 | 7139039.2  | 5445186.541 | 0.7744369 | 7139039.2 | 5445186.541 | 0.7744369 |
| Dan Dong | 0.03 | 14869067.79  | 9868392.42  | 5934858.747 | 0.611294561 | 9868392.4  | 5994245.684 | 0.6174115 | 9868392.4 | 5994245.684 | 0.6174115 |
| Dan Dong | 0.04 | 20816838.85  | 12434705.14 | 6463941.02  | 0.5211744   | 12434705.1 | 6451904.877 | 0.520204  | 12434705  | 6451904.877 | 0.520204  |

|           |      |              |             |             |             |            |             |           |           |             |           |
|-----------|------|--------------|-------------|-------------|-------------|------------|-------------|-----------|-----------|-------------|-----------|
| Dan Dong  | 0.05 | 26764610.18  | 15413877.36 | 4368036.901 | 0.284565012 | 15413877.4 | 4378154.313 | 0.2852241 | 15413877  | 4596338.147 | 0.2994382 |
| Dan Dong  | 0.06 | 32712372.50  | 18953874.32 | 6357979.334 | 0.336473773 | 18953874.3 | 6384754.494 | 0.3378908 | 18953874  | 6630313.788 | 0.3508861 |
| Dan Dong  | 0.07 | 38660141.43  | 22585984.11 | 4916385.435 | 0.219340134 | 22585984.1 | 4916385.435 | 0.2193401 | 22585984  | 5304869.733 | 0.236672  |
| Dan Dong  | 0.08 | 44607894.47  | 25426771.73 | 3866851.193 | 0.153821267 | 25426771.7 | 3866190.796 | 0.153795  | 25426772  | 3925559.86  | 0.1561567 |
| Dan Dong  | 0.09 | 50555669.39  | 29665996.91 | 3327841.143 | 0.113168901 | 29665996.9 | 3322561.057 | 0.1129893 | 29665997  | 3326461.183 | 0.113122  |
| Dan Dong  | 0.10 | 56503421.14  | 32837565.89 | 3473258.906 | 0.108529926 | 32837565.9 | 3484189.614 | 0.1088558 | 32837566  | 4294041.733 | 0.1341578 |
| Dan Dong  | 0.11 | 62451175.90  | 36488843.39 | 2228993.878 | 0.061667123 | 36488843.4 | 2224434.519 | 0.061541  | 36488843  | 2381980.578 | 0.0658996 |
| Dan Dong  | 0.12 | 68398931.38  | 37216867.9  | 1723319.81  | 0.046622574 | 37216867.9 | 1716759.096 | 0.0464451 | 37216835  | 1716759.096 | 0.0464451 |
| Dan Dong  | 0.13 | 74346690.61  | 39441880.8  | 1918582.25  | 0.049118841 | 39441880.8 | 1906158.237 | 0.0488008 | 39443024  | 1906158.237 | 0.0487993 |
| Dan Dong  | 0.14 | 80294418.16  | 41223564.99 | 1122554.807 | 0.02755738  | 41223565.6 | 1164220.526 | 0.0285802 | 41223544  | 1264905.921 | 0.0310519 |
| Dan Dong  | 0.15 | 86242173.56  | 41689461.89 | 1083779.235 | 0.026282371 | 41689462.0 | 1146288.028 | 0.0277983 | 41682106  | 1741650.168 | 0.0422345 |
| Dan Dong  | 0.16 | 92189921.36  | 42660451.24 | 2258621.648 | 0.054001998 | 42660451.2 | 2248896.48  | 0.0537695 | 42655115  | 2203507.986 | 0.0527121 |
| Dan Dong  | 0.17 | 98137647.13  | 41687011.04 | 2054878.536 | 0.050180316 | 41687011.2 | 2054878.536 | 0.0501745 | 41692416  | 2058474.731 | 0.0502556 |
| Dan Dong  | 0.18 | 104085375.23 | 41677443.44 | 2686164.326 | 0.065591565 | 41677443.5 | 2678682.006 | 0.0654282 | 41677443  | 2678682.006 | 0.0654282 |
| Dan Dong  | 0.19 | 110033097.41 | 40170052.09 | 1080164.91  | 0.02772066  | 40170052.0 | 1074926.795 | 0.0275989 | 40170052  | 1074926.795 | 0.0275989 |
| Dan Dong  | 0.20 | 115980827.00 | 37284917.36 | 393840.0241 | 0.010980321 | 37284917.5 | 393840.0241 | 0.0109803 | 37284917  | 393840.0241 | 0.0109803 |
| Fu Shun   | 0.01 | 2897959.50   | 2897959.515 | 2867570.226 | 0.989513556 | 2897959.5  | 2867570.226 | 0.9895136 | 2897959.5 | 2867570.226 | 0.9895136 |
| Fu Shun   | 0.02 | 8694567.53   | 8694567.494 | 7430809.282 | 0.854649675 | 8694567.5  | 7430809.282 | 0.8546497 | 8694567.5 | 7430809.282 | 0.8546497 |
| Fu Shun   | 0.03 | 14491175.72  | 14491175.69 | 10111340.03 | 0.73643387  | 14491175.7 | 10565167.77 | 0.7688533 | 14491176  | 10651966.3  | 0.7751699 |
| Fu Shun   | 0.04 | 20287786.29  | 20287786.38 | 12757130.52 | 0.651602459 | 20287786.4 | 13209837.12 | 0.6749933 | 20287786  | 13212724.03 | 0.6751408 |
| Fu Shun   | 0.05 | 26084397.12  | 26084397.1  | 11983950.81 | 0.470583072 | 26084397.1 | 12039760.95 | 0.4728356 | 26084397  | 12177358.91 | 0.4782395 |
| Fu Shun   | 0.06 | 31880999.16  | 31880999.09 | 10567841.18 | 0.337218776 | 31880999.1 | 10659982.29 | 0.3401439 | 31880999  | 11065281.59 | 0.3530764 |
| Fu Shun   | 0.07 | 37677607.65  | 37415237.18 | 11220843.98 | 0.302630944 | 37415237.1 | 11499887.11 | 0.3100725 | 37415237  | 11493735.43 | 0.3099066 |
| Fu Shun   | 0.08 | 43474200.64  | 40801325.01 | 10905731.26 | 0.270742002 | 40801325.0 | 11554816.64 | 0.286857  | 40801325  | 11584120.81 | 0.2875845 |
| Fu Shun   | 0.09 | 49270814.94  | 45618601.38 | 9239027.201 | 0.204810928 | 45618601.4 | 9858681.507 | 0.2185739 | 45618601  | 9953163.818 | 0.2206364 |
| Fu Shun   | 0.10 | 55067406.67  | 46367461.25 | 8420855.781 | 0.183004709 | 46367461.3 | 8606099.082 | 0.1870305 | 46367461  | 9147270.427 | 0.1986877 |
| Fu Shun   | 0.11 | 60864001.32  | 47937003.94 | 8181395.263 | 0.173140737 | 47936996.8 | 8376291.395 | 0.1772653 | 47936997  | 8817802.67  | 0.1866229 |
| Fu Shun   | 0.12 | 66660596.65  | 49072069.73 | 5614847.604 | 0.116286258 | 49072069.7 | 5845499.587 | 0.1210632 | 49072070  | 6570390.887 | 0.1359917 |
| Fu Shun   | 0.13 | 72457195.63  | 49493636.49 | 5674753.414 | 0.118600795 | 49493636.5 | 5887591.843 | 0.1230491 | 49493636  | 6212732.553 | 0.1297825 |
| Fu Shun   | 0.14 | 78253763.73  | 47498181.56 | 4810191.252 | 0.103161613 | 47498181.3 | 5553017.494 | 0.1190926 | 47498181  | 6112889.154 | 0.1311014 |
| Liao Yang | 0.01 | 2923424.14   | 2923424.154 | 2923424.154 | 1           | 2923424.2  | 2923424.154 | 1         | 2923424.2 | 2923424.154 | 1         |
| Liao Yang | 0.02 | 8770967.52   | 8770967.435 | 8770967.435 | 1           | 8770967.4  | 8770967.435 | 1         | 8770967.4 | 8770967.435 | 1         |
| Liao Yang | 0.03 | 14618511.05  | 14618511.12 | 12855882.12 | 0.895046271 | 14618511.1 | 12882973.64 | 0.8969324 | 14618511  | 13005424.47 | 0.9054576 |

|           |      |             |             |             |             |            |             |           |           |             |           |
|-----------|------|-------------|-------------|-------------|-------------|------------|-------------|-----------|-----------|-------------|-----------|
| Liao Yang | 0.04 | 20466057.00 | 20466057.01 | 10029879.69 | 0.512435353 | 20466057.0 | 10071568.75 | 0.5159319 | 20466057  | 10092418.52 | 0.5168887 |
| Liao Yang | 0.05 | 26313603.19 | 26313603.19 | 7182793.49  | 0.278248941 | 26313603.2 | 7330733.372 | 0.284374  | 26313603  | 8349026.782 | 0.3238757 |
| Liao Yang | 0.06 | 32161140.54 | 32161140.59 | 7321489.342 | 0.231758208 | 32161140.6 | 7598835.428 | 0.2405503 | 32161141  | 9852912.313 | 0.3119058 |
| Liao Yang | 0.07 | 38008684.37 | 36282565.9  | 9640409.784 | 0.279179511 | 36282565.9 | 9647085.162 | 0.2783428 | 36282566  | 10836292.3  | 0.3126544 |
| Liao Yang | 0.08 | 43856212.59 | 35336773.43 | 9201127.015 | 0.264495709 | 35336773.4 | 9432051.451 | 0.2711339 | 35336773  | 9470938.792 | 0.2722517 |
| Liao Yang | 0.09 | 49703762.30 | 38317427.4  | 8288339.419 | 0.219156327 | 38317422.7 | 8232931.772 | 0.2176913 | 38317423  | 9316586.513 | 0.2463448 |
| Liao Yang | 0.10 | 55551289.24 | 37254984.97 | 5807863.968 | 0.157979828 | 37254985.0 | 5621143.978 | 0.1529009 | 37254985  | 5974378.09  | 0.1625092 |
| Liao Yang | 0.11 | 61398819.13 | 39022440.24 | 4099019.067 | 0.107752611 | 39022440.3 | 4223708.852 | 0.1110304 | 39022440  | 4294035.005 | 0.1128791 |
| Liao Yang | 0.12 | 67246349.71 | 40741127.1  | 3566228.528 | 0.09363999  | 40741127.8 | 3554923.103 | 0.0933948 | 40741132  | 3736247.519 | 0.0981585 |
| Liao Yang | 0.13 | 73093883.98 | 44622984.86 | 5343758.993 | 0.12709484  | 44622984.8 | 5346457.443 | 0.1294161 | 44622985  | 5346457.443 | 0.1294161 |
| Liao Yang | 0.14 | 78941387.10 | 49742006.08 | 4464116.927 | 0.098170472 | 49742006.3 | 4471186.921 | 0.0996979 | 49742006  | 4471186.921 | 0.0974349 |
| Liao Yang | 0.15 | 84788917.59 | 44678807.52 | 2937915.568 | 0.069948301 | 44678807.5 | 2992546.406 | 0.0712202 | 44678808  | 2992546.406 | 0.0707659 |
| Pan Jin   | 0.01 | 2929615.13  | 2929615.141 | 2929615.141 | 1           | 2929615.1  | 2929615.141 | 1         | 2929615.1 | 2929615.141 | 1         |
| Pan Jin   | 0.02 | 8789541.96  | 8789541.908 | 6822819.102 | 0.776242855 | 8789541.9  | 8178632.84  | 0.9304959 | 8789541.9 | 8227059.372 | 0.9360055 |
| Pan Jin   | 0.03 | 14649468.95 | 14649468.97 | 8253784.908 | 0.56341871  | 14649469.0 | 8945764.196 | 0.6106545 | 14649469  | 10178285.64 | 0.6947887 |
| Pan Jin   | 0.04 | 20509398.35 | 20509398.41 | 9344972.23  | 0.45564341  | 20509398.4 | 9913042.754 | 0.4833415 | 20509398  | 11644192.57 | 0.5677491 |
| Pan Jin   | 0.05 | 26369328.00 | 26228389.97 | 8842471.967 | 0.337133617 | 26228390.0 | 9547722.229 | 0.3640224 | 26228390  | 14277271.08 | 0.5443442 |
| Pan Jin   | 0.06 | 32229248.78 | 30772323.36 | 4982394.899 | 0.167334055 | 30772323.4 | 5773040.957 | 0.193888  | 30772323  | 7413348.565 | 0.2489778 |
| Pan Jin   | 0.07 | 38089176.07 | 34071921.77 | 7802966.916 | 0.252953147 | 34071921.8 | 8177389.752 | 0.2641852 | 34071921  | 9709494.541 | 0.3136326 |
| Pan Jin   | 0.08 | 43949087.71 | 39125363.41 | 7963249.39  | 0.218270585 | 39125363.4 | 7972201.02  | 0.2174583 | 39125363  | 8415118.702 | 0.2295656 |
| Pan Jin   | 0.09 | 49809020.88 | 44510737.69 | 9880627.684 | 0.234461258 | 44510736.7 | 9867455.752 | 0.2341134 | 44510737  | 9874374.368 | 0.2342776 |
| Pan Jin   | 0.10 | 55668931.24 | 49045663.04 | 8091244.805 | 0.171443981 | 49045663.1 | 8090803.475 | 0.1714346 | 49045663  | 7853824.725 | 0.1664133 |
| Pan Jin   | 0.11 | 61528844.56 | 52785866.8  | 8155586.751 | 0.155893562 | 52785866.8 | 8252427.232 | 0.1577447 | 52785867  | 8810001.396 | 0.1684027 |
| Pan Jin   | 0.12 | 67388758.57 | 54006756.62 | 8163592.068 | 0.151759348 | 54006756.6 | 8173736.447 | 0.1519479 | 54006757  | 9611858.356 | 0.1786823 |
| Pan Jin   | 0.13 | 73248676.27 | 53170913.55 | 9678084.616 | 0.182704145 | 53170913.6 | 9677483.363 | 0.1826928 | 53170914  | 10761881.05 | 0.2031642 |
| Pan Jin   | 0.14 | 79108562.77 | 50730152.82 | 8808618.563 | 0.174980152 | 50730152.8 | 8808618.563 | 0.1749802 | 50730153  | 8812048.302 | 0.1750483 |
| Pan Jin   | 0.15 | 84968476.69 | 50100299.33 | 5517192.405 | 0.111748351 | 50100299.3 | 5517192.405 | 0.1117473 | 50100299  | 5517192.405 | 0.1117473 |
| Tie Ling  | 0.01 | 2877582.59  | 2877582.574 | 2877582.574 | 1           | 2877582.6  | 2877582.574 | 1         | 2877582.6 | 2877582.574 | 1         |
| Tie Ling  | 0.02 | 8633431.96  | 8633431.996 | 7690125.878 | 0.890737992 | 8633432.0  | 7690125.878 | 0.890738  | 8633432   | 7690125.878 | 0.890738  |
| Tie Ling  | 0.03 | 14389281.47 | 13991203.48 | 8204959.789 | 0.590544342 | 13991203.5 | 8389476.737 | 0.6038248 | 13991203  | 8599568.78  | 0.618946  |
| Tie Ling  | 0.04 | 20145133.36 | 15945868.63 | 3280466.907 | 0.227567996 | 15945868.6 | 3552924.539 | 0.246757  | 15945869  | 3755702.756 | 0.2608403 |
| Tie Ling  | 0.05 | 25900985.50 | 14612489.93 | 504778.3855 | 0.035959838 | 14612489.9 | 1277135.456 | 0.091299  | 14612490  | 1431753.15  | 0.1023522 |
| Tie Ling  | 0.06 | 31656828.92 | 15652270.78 | 565052.7074 | 0.036414638 | 15652270.8 | 1357092.578 | 0.0873501 | 15652271  | 1357092.578 | 0.0873501 |

|          |      |              |             |             |             |            |             |           |           |             |           |
|----------|------|--------------|-------------|-------------|-------------|------------|-------------|-----------|-----------|-------------|-----------|
| Tie Ling | 0.07 | 37412678.73  | 16318939.21 | 537227.1575 | 0.03311357  | 16318936.2 | 938455.7397 | 0.0577023 | 16318936  | 938455.7397 | 0.0577023 |
| Tie Ling | 0.08 | 43168513.16  | 14954174.08 | 867348.2237 | 0.05800041  | 14954173.4 | 864813.2462 | 0.0578309 | 14954173  | 957380.4889 | 0.064021  |
| Tie Ling | 0.09 | 48924368.74  | 13344183.69 | 228824.2724 | 0.017147866 | 13344183.7 | 277784.3176 | 0.0208169 | 13344184  | 2096593.07  | 0.1571166 |
| Tie Ling | 0.10 | 54680201.91  | 11425949.91 | 883690.4184 | 0.077340652 | 11425949.9 | 863755.0979 | 0.0755959 | 11425950  | 1386756.964 | 0.1213691 |
| Tie Ling | 0.11 | 198574678.91 | 7004152.278 | 366160.0778 | 0.052277572 | 7004152.2  | 379400.2673 | 0.0541679 | 7004152.2 | 893150.4214 | 0.1275173 |
| Tie Ling | 0.12 | 204330370.29 | 9131893.766 | 923131.4356 | 0.101088718 | 9131893.7  | 1065931.752 | 0.1167263 | 9131893.8 | 1314561.152 | 0.1439527 |
| Ying Kou | 0.01 | 2953673.52   | 2953673.543 | 2953673.543 | 1           | 2953673.5  | 2953673.543 | 1         | 2953673.5 | 2953673.543 | 1         |
| Ying Kou | 0.02 | 20677824.27  | 5186608.572 | 5134742.487 | 0.99        | 5186608.6  | 5134742.487 | 0.99      | 5186608.6 | 5134742.487 | 0.99      |
| Ying Kou | 0.03 | 26585876.45  | 5337229.081 | 4323155.555 | 0.81        | 5337229.1  | 4323155.555 | 0.81      | 7243382.3 | 6229308.798 | 0.86      |
| Ying Kou | 0.04 | 32493919.69  | 5860423.169 | 4380617.706 | 0.747491705 | 5860423.2  | 4380617.706 | 0.7474917 | 7307382   | 5827576.5   | 0.7974917 |
| Ying Kou | 0.05 | 38401969.50  | 9939486.147 | 6976094.775 | 0.701856683 | 10654188.6 | 7690797.27  | 0.7218567 | 14516230  | 11552838.75 | 0.7958567 |
| Ying Kou | 0.06 | 44310003.51  | 20229910.06 | 14159959.51 | 0.699951679 | 19910231.0 | 13936199.64 | 0.6999517 | 23891508  | 17917476.33 | 0.7499517 |
| Ying Kou | 0.07 | 50218059.26  | 29739592.45 | 19160639.67 | 0.644280506 | 27882505.5 | 18521804.86 | 0.6642805 | 35227753  | 25867052.11 | 0.7342805 |
| Ying Kou | 0.08 | 56126092.00  | 23756527.43 | 12175317.58 | 0.520167407 | 25032502.3 | 14143305.67 | 0.5730092 | 30723145  | 19833948.74 | 0.6530092 |
| Ying Kou | 0.09 | 62034127.72  | 32532440.15 | 16248986.45 | 0.513995856 | 35773804.2 | 20805082.3  | 0.5969264 | 40709557  | 25740835.23 | 0.6469264 |
| Ying Kou | 0.10 | 67942164.14  | 39367664.99 | 15928294.09 | 0.423157003 | 41155296.4 | 19294686.19 | 0.4899205 | 45435350  | 23574739.98 | 0.5399205 |
| Ying Kou | 0.11 | 73850204.29  | 34483733.16 | 11046676    | 0.339583094 | 37068011.5 | 15012494.37 | 0.4231983 | 40434924  | 18379406.44 | 0.4731983 |
| Ying Kou | 0.12 | 79758212.98  | 30168390.44 | 8540362.769 | 0.318920507 | 29856798.5 | 11262565.29 | 0.4086461 | 34202691  | 15608458.03 | 0.4891926 |
| Ying Kou | 0.13 | 85666249.33  | 35279559.85 | 8124572.857 | 0.258570811 | 31526768.8 | 9651246.646 | 0.3372229 | 34370822  | 12495300.29 | 0.3971321 |
| Ying Kou | 0.14 | 91574278.12  | 27709716.95 | 4652933.918 | 0.194985525 | 21760586.5 | 3172111.945 | 0.172956  | 23822014  | 5233539.513 | 0.2565209 |
| Ying Kou | 0.15 | 85666249.33  | 9603039.629 | 833620.5641 | 0.153394176 | 10949160.5 | 1363982.028 | 0.2413895 | 11333492  | 1747376.468 | 0.2895464 |
| Ying Kou | 0.16 | 91574278.12  | 9989419.554 | 1144963.123 | 0.135841645 | 10064823.5 | 1431702.623 | 0.2081055 | 9210952.1 | 1340076.355 | 0.2223889 |
| Ying Kou | 0.17 | 97482285.02  | 8733628.139 | 1136956.832 | 0.153181031 | 10513292.5 | 1019601.304 | 0.1579146 | 10840871  | 1478385.232 | 0.2179146 |
| Ying Kou | 0.18 | 103390294.24 | 11994195.46 | 1395339.761 | 0.12550644  | 12454430.4 | 1368708.162 | 0.1255064 | 13257787  | 2172065.011 | 0.1855064 |
| Ying Kou | 0.19 | 109298297.57 | 13936379.48 | 1472730.64  | 0.10957051  | 14939784.3 | 1429561.406 | 0.1066073 | 16356764  | 2915014.246 | 0.1966073 |
| Ying Kou | 0.20 | 115206308.25 | 11049892.67 | 1224172.78  | 0.110785943 | 11133756.4 | 1150086.305 | 0.10474   | 11178634  | 2036808.213 | 0.18474   |
| Ying Kou | 0.21 | 121114310.90 | 10689336.27 | 1154067.773 | 0.1079644   | 10741210.5 | 1272848.444 | 0.1185014 | 11548127  | 2882519.698 | 0.2496093 |
| Ying Kou | 0.22 | 127022285.14 | 3870662.635 | 435841.1878 | 0.112601182 | 3738001.2  | 303179.757  | 0.0811075 | 3989363.6 | 552996.6127 | 0.1386178 |
| Ying Kou | 0.23 | 132930277.57 | 9099409.608 | 896058.8651 | 0.098474396 | 8897080.2  | 693727.2035 | 0.0779725 | 9732107.5 | 1528754.417 | 0.1570836 |
| Ying Kou | 0.24 | 138838249.05 | 16600846.66 | 1511492.665 | 0.091049131 | 16622728.8 | 1536049.989 | 0.0924066 | 17392492  | 2304062.024 | 0.1324745 |
| Ying Kou | 0.25 | 144746226.42 | 19812698.15 | 1614025.09  | 0.081464174 | 20052493.1 | 1869705.177 | 0.0932405 | 20352316  | 2777179.657 | 0.1364552 |
| Ying Kou | 0.26 | 150654200.87 | 20185512.21 | 1702544.464 | 0.084344873 | 20461486.5 | 1994088.528 | 0.0974557 | 19062269  | 2550097.125 | 0.1337772 |
| Ying Kou | 0.27 | 156562134.94 | 19728864.84 | 1897090.632 | 0.096158124 | 19518593.4 | 2176020.645 | 0.1114845 | 18077777  | 2767727.749 | 0.1531011 |

|          |      |              |             |             |             |            |             |           |           |             |           |
|----------|------|--------------|-------------|-------------|-------------|------------|-------------|-----------|-----------|-------------|-----------|
| Ying Kou | 0.28 | 162470107.84 | 16763514.53 | 1347187.541 | 0.080364266 | 16239399.1 | 2168825.641 | 0.1335533 | 14501804  | 2084721.502 | 0.143756  |
| Ying Kou | 0.29 | 168378041.57 | 8307214.062 | 972717.4417 | 0.120359129 | 7618773.8  | 669819.343  | 0.0905975 | 7800066.5 | 1012022.73  | 0.1336066 |
