# Supplementary material for: Research on Urban Expansion and Population Density Change of an Urban Agglomeration in the Central‐Southern Region of Liaoning Province, China
Source: Hindawi journal article supplement (doi:10.1155/2022/5327023), 2022-01-01
Supplement: f1 [file 5327023.f1.zip]

Archive with 4 entries (4 files):
- 5327023.f1/Supplemental Table  1.pdf
- 5327023.f1/Supplemental Table  3.pdf
- 5327023.f1/Supplemental Table 2.pdf
- 5327023.f1/Supplemental Table 4.pdf
