# Supplementary material for: Research on Urban Expansion and Population Density Change of an Urban Agglomeration in the Central‐Southern Region of Liaoning Province, China
Source: Hindawi journal article supplement (doi:10.1155/2022/5327023), 2022-01-01
Supplement: f1 [file 5327023.f1.zip]

| kp        |       |       |       |           |           |           |             |             |             |
|-----------|-------|-------|-------|-----------|-----------|-----------|-------------|-------------|-------------|
|           | 1995  | 2005  | 2015  | 1995-2005 | 2005-2015 | 1995-2015 | 1995-2005   | 2005-2015   | 1995-2015   |
| Dan Dong  | 0.569 | 0.557 | 0.572 | -0.01     | 0.01      | 0.00      | Compacted   | Spread      | Maintenance |
| Da Lian   | 0.999 | 0.791 | 0.732 | -0.21     | -0.06     | -0.27     | Compacted   | Compacted   | Compacted   |
| Fu Shun   | 0.454 | 0.436 | 0.431 | -0.02     | 0.00      | -0.02     | Compacted   | Maintenance | Compacted   |
| Ben Xi    | 0.390 | 0.389 | 0.382 | 0.00      | -0.01     | -0.01     | Maintenance | Maintenance | Maintenance |
| Shen Yang | 0.286 | 0.317 | 0.378 | 0.03      | 0.06      | 0.09      | Spread      | Spread      | Spread      |
| Pan Jin   | 0.430 | 0.349 | 0.400 | -0.08     | 0.05      | -0.03     | Compacted   | Spread      | Compacted   |
| Ying Kou  | 0.499 | 0.518 | 0.470 | 0.02      | -0.05     | -0.03     | Spread      | Compacted   | Compacted   |
| Liao Yang | 0.183 | 0.187 | 0.232 | 0.00      | 0.04      | 0.05      | Maintenance | Spread      | Spread      |
| Tie Ling  | 0.223 | 0.235 | 0.222 | 0.01      | -0.01     | 0.00      | Spread      | Compacted   | Maintenance |
| An Shan   | 0.744 | 0.656 | 0.686 | -0.09     | 0.03      | -0.06     | Compacted   | Spread      | Compacted   |
