# Supplementary material for: Research on Urban Expansion and Population Density Change of an Urban Agglomeration in the Central‐Southern Region of Liaoning Province, China
Source: Hindawi journal article supplement (doi:10.1155/2022/5327023), 2022-01-01
Supplement: f1 [file 5327023.f1.zip › 5327023.f1/Supplemental Table 1.pdf]

| Population density (Person/km <sup>2</sup> ) |       |       |       |
|----------------------------------------------|-------|-------|-------|
|                                              | 1995  | 2005  | 2015  |
| Dan Dong                                     | 11.89 | 9.06  | 8.34  |
| Da Lian                                      | 10.37 | 11.52 | 11.85 |
| Fu Shun                                      | 20.46 | 19.76 | 10.07 |
| Ben Xi                                       | 7.22  | 7.37  | 6.14  |
| Shen Yang                                    | 13.36 | 14.09 | 15.22 |
| Pan Jin                                      | 20.12 | 21.5  | 25.61 |
| Ying Kou                                     | 9.38  | 12.17 | 13.19 |
| Liao Yang                                    | 11.8  | 12.48 | 8.1   |
| Tie Ling                                     | 11.47 | 6.77  | 6.65  |
| An Shan                                      | 22.94 | 23.41 | 19.08 |

# Population density change rate

|           | 1995-2005 | 2005-2015 | 1995-2015 |
|-----------|-----------|-----------|-----------|
| Dan Dong  | -0.027    | -0.008    | -0.018    |
| Da Lian   | 0.011     | 0.003     | 0.007     |
| Fu Shun   | -0.003    | -0.065    | -0.035    |
| Ben Xi    | 0.002     | -0.018    | -0.008    |
| Shen Yang | 0.005     | 0.008     | 0.007     |
| Pan Jin   | 0.007     | 0.018     | 0.012     |
| Ying Kou  | 0.026     | 0.008     | 0.017     |
| Liao Yang | 0.006     | -0.042    | -0.019    |
| Tie Ling  | -0.051    | -0.002    | -0.027    |
| An Shan   | 0.002     | -0.020    | -0.009    |
