# Supplementary material for: Research on Urban Expansion and Population Density Change of an Urban Agglomeration in the Central‐Southern Region of Liaoning Province, China
Source: Hindawi journal article supplement (doi:10.1155/2022/5327023), 2022-01-01
Supplement: f1 [file 5327023.f1.zip › 5327023.f1/Supplemental Table 3.pdf]

|           | City expansion rate |           |           |
|-----------|---------------------|-----------|-----------|
|           | 1995-2005           | 2005-2015 | 1995-2015 |
| Dan Dong  | 0.001               | 0.001     | 0.001     |
| Da Lian   | 0.022               | 0.001     | 0.012     |
| Fu Shun   | 0.001               | 0.000     | 0.001     |
| Ben Xi    | 0.000               | -0.001    | -0.001    |
| Shen Yang | 0.009               | 0.016     | 0.013     |
| Pan Jin   | 0.010               | 0.018     | 0.014     |
| Ying Kou  | 0.010               | 0.007     | 0.009     |
| Liao Yang | 0.000               | 0.002     | 0.001     |
| Tie Ling  | 0.001               | -0.001    | 0.000     |
| An Shan   | 0.008               | 0.009     | 0.008     |
